November 2013

# PSYCHIATRIC SERVICES

A Journal of the  
American Psychiatric  
Association

- ◆ Geographic Variations in Stimulant Treatment of Adults and Children
- ◆ Psychiatric Practice in an Era of Reform: New Opportunities
- ◆ After the Trial Ends: Sustaining Practice of Evidence-Based Care
- ◆ Can an ACT Team Be a Medical Home? A Look at Standards

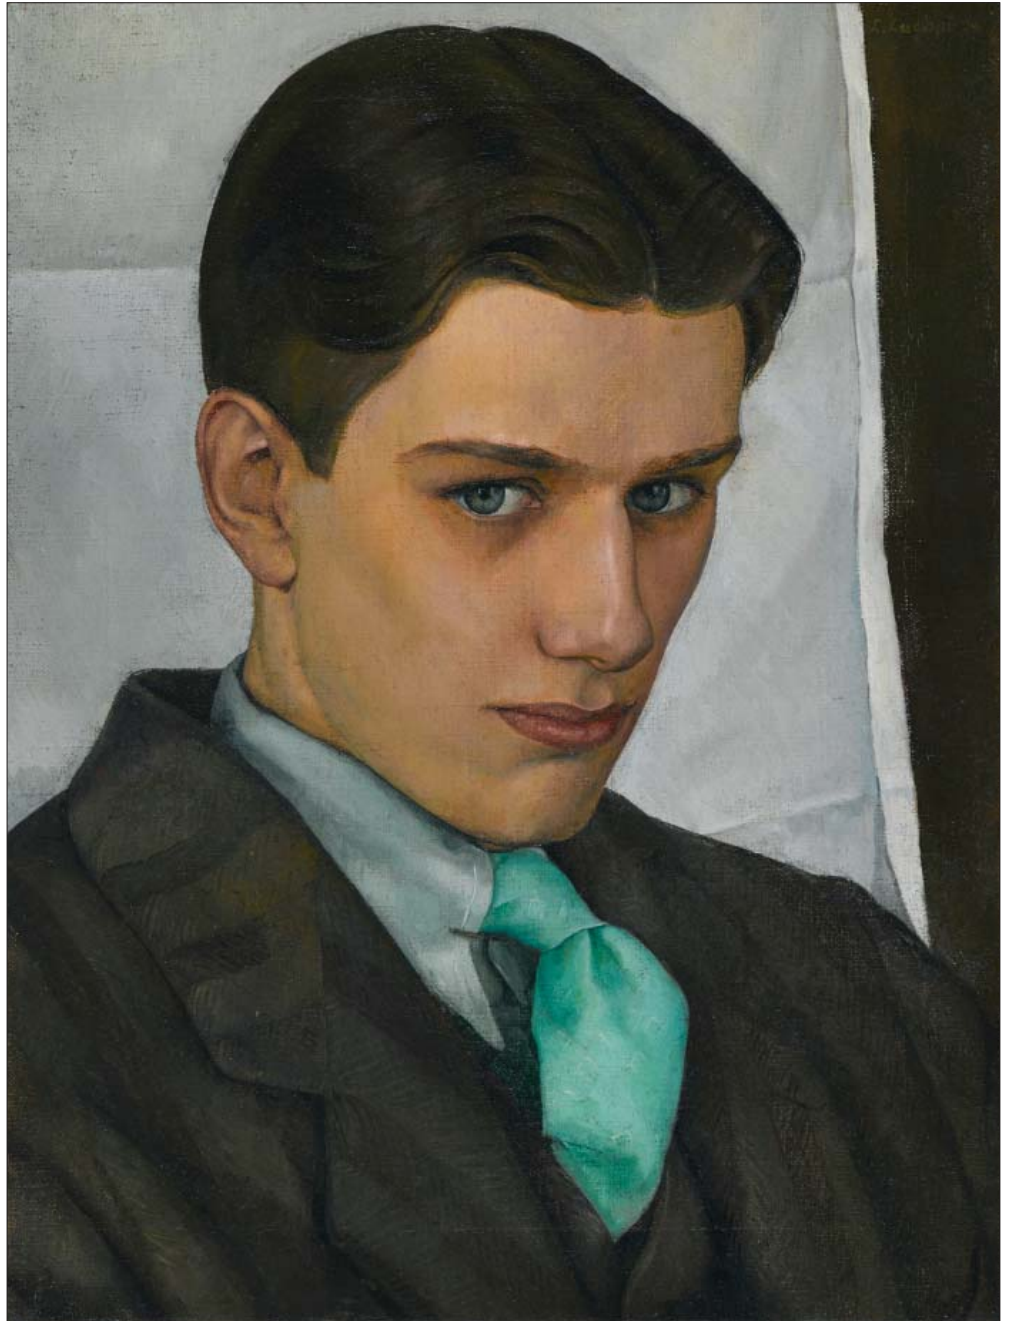

Source: https://psychiatryonline.org/doi/suppl/10.1176/ps.2013.64.issue-11/suppl_file/cover.pdf
